# Supplementary material for: Development of Superabsorbent Polymer (SAP) Seed Coating Technology to Enhance Germination and Stand Establishment in Red Clover Cover Crop
Source: MDPI journal article supplement (doi:10.3390/agronomy13020438), 2023-02-01
Supplement: s1 [file s1]

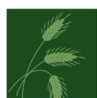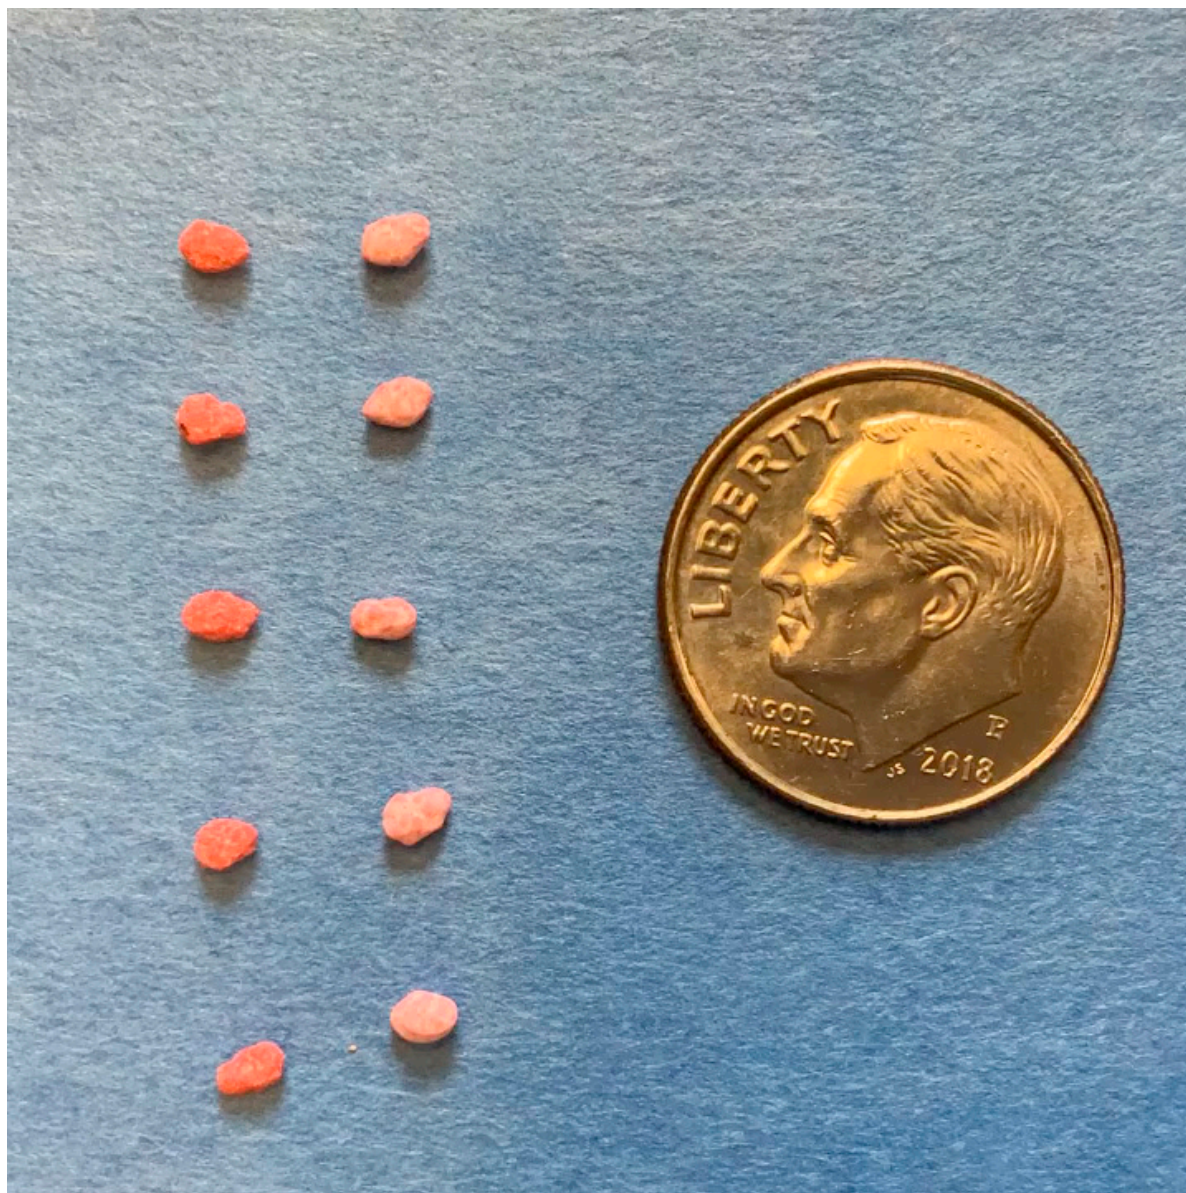

**Video S1.** Time-lapse video showing 20% SAP coating swelling over a 60 second period. SAP coated on left and coated control on right.

**Table S1.** Field location, soil type, planting date, and final stand count date.

| Location                                 | *GPS                                       | *Soil                                         | Planting date/Final stand count date  |                                      |                                      |
|------------------------------------------|--------------------------------------------|-----------------------------------------------|---------------------------------------|--------------------------------------|--------------------------------------|
| Caldwell Rd.<br>Ithaca, NY,<br>USA 14850 | 42.44° 96' 63" N<br><br>76.46° 28' 15.0" W | Williamson<br><br>very fine<br><br>sandy loam | <b>Trial 1</b><br><br>June 26/July 26 | <b>Trial 2</b><br><br>July 24/Aug 22 | <b>Trial 3</b><br><br>Sept 17/Oct 17 |

\*[https://cuaes.cals.cornell.edu/sites/cuaes.cals.cornell.edu/files/shared/documents/CAF\\_Caldwell\\_17x11.pdf](https://cuaes.cals.cornell.edu/sites/cuaes.cals.cornell.edu/files/shared/documents/CAF_Caldwell_17x11.pdf)

**Table S2.** Weather conditions of the three field studies after planting. Data from the first 10 days after planting for Trial 1 and 2, while 15 days for Trial 3 due to cold night conditions.

|                          | Trial 1 | Trial 2 | Trial 3 |
|--------------------------|---------|---------|---------|
| *Total Precipitation mm  | 29      | 43      | 63      |
| *Max air Temperature ° C | 27      | 29      | 21      |
| *Min air Temperature ° C | 14      | 15      | 6       |

\*<https://www.nrcc.cornell.edu/wxstation/ithaca/ithaca.html>
